# Supplementary material
Source: publisher figshare collection journal article supplement (https://frontiersin.figshare.com/ndownloader/files/21476076)
Supplement: Supplementary file [file 21476076]

## *Supplementary Material*

### **Differential Expression of HERV-W in Peripheral blood in Multiple Sclerosis and Healthy Patients in Two Different Ethnic Groups**

Rachael Tarlinton<sup>1\*</sup>, Belinda Wang<sup>1</sup>, Elena Morandi<sup>2</sup>, Bruno Gran<sup>3</sup>, Timur Khaiboullin<sup>4</sup>, Ekatarina Martynova<sup>5</sup>, Albert Rizvanov<sup>5</sup>, Svetlana Khaiboullina<sup>5,6</sup>

\* **Correspondence:** Rachael.tarlinton@nottingham.ac.uk

#### **1 Supplementary Data**

#### **2 Supplementary Figures and Tables**

.

#### **2.1 Supplementary Figures**

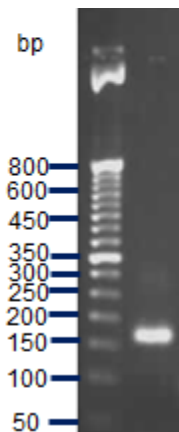

**Supplementary Figure 1. DNA gel electrophoresis for validation of gene amplification in RT-PCR.** 1 patient sample run on a 2% agarose gel stained with Ethidium Bromide. The first line accommodates a 50 base pairs (bp) ladder. MSRV<sub>env</sub> amplicon size=166bp.

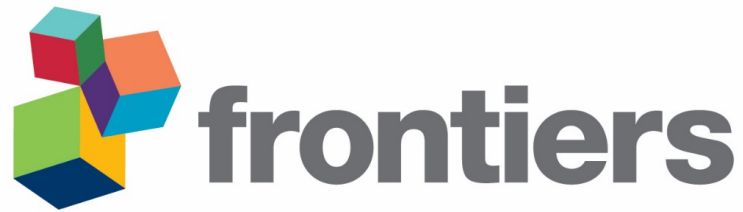

**Supplementary Figure 1.** The figure legends are required to have the same font as the main text, 12 point normal Times New Roman, single spaced. Please use a single paragraph for each legend and prepare the figures keeping in mind the PDF layout.
